# Supplementary material for: T-cell-mediated cytotoxicity toward platelets in chronic idiopathic thrombocytopenic purpura
Source: Springer Nature journal article supplement (doi:10.1038/nm921), 2003-08-22
Supplement: 41591_2003_BFnm921_MOESM1_ESM.pdf [file 41591_2003_BFnm921_MOESM1_ESM.pdf]

## Supplementary Methods

### Subjects

The characteristics of the patients are shown in Table 1. All patients fulfilled the diagnostic criteria for chronic ITP as evidenced by isolated thrombocytopenia lasting more than 6 months, presence of normal or increased numbers of megakaryocytes in bone marrow biopsies, normal spleen size and no other cause of thrombocytopenia. The patients were divided into two groups based on their platelet count (plc): (i) “active disease”  $< 50 \times 10^9/L$  and (ii) “in remission”  $> 150 \times 10^9/L$ . The controls consisted of 15 healthy adults (11 females and 4 males) with normal plc (range 184-340; mean  $249 \pm 10$ ). The study was approved by the Ethics Committee of Göteborg University, and all subjects gave their informed consent.

**Table 1.** Patient characteristics.

| Patient | Gender | Age (years) | Plc ( $10^9/L$ ) | Medication             | Category  | Included in:         |                |             |
|---------|--------|-------------|------------------|------------------------|-----------|----------------------|----------------|-------------|
|         |        |             |                  |                        |           | Expression profiling | Flow cytometry | Lysis assay |
| 1*      | M      | 37          | 177              | None                   | Remission | Yes                  | Yes            | Yes         |
| 2*      | M      | 56          | 299              | None                   | Remission | Yes                  | Yes            | Yes         |
| 3*      | M      | 59          | 11               | Prednisone 5 mg q.d.   | Active    | Yes                  | No             | No          |
| 4*      | F      | 53          | 45               | Prednisone 5 mg q.d.   | Active    | Yes                  | Yes            | Yes         |
| 5*      | F      | 49          | 382              | None                   | Remission | Yes                  | Yes            | No          |
| 6       | F      | 28          | 173              | None                   | Remission | Yes                  | No             | No          |
| 7       | F      | 28          | 50               | None                   | Active    | Yes                  | No             | No          |
| 8*      | F      | 44          | 33               | Prednisone 10 mg q.d.  | Active    | Yes                  | Yes            | Yes         |
| 9       | F      | 69          | 324              | Prednisone 7.5 mg q.d. | Remission | Yes                  | No             | No          |
| 10*     | M      | 38          | 24               | None                   | Active    | Yes                  | Yes            | Yes         |
| 11      | M      | 49          | 163              | None                   | Remission | No                   | No             | Yes         |
| 12      | M      | 37          | 35               | None                   | Active    | No                   | Yes            | Yes         |
| 13*     | F      | 26          | 20               | None                   | Active    | No                   | No             | Yes         |
| 14*     | F      | 25          | 165              | None                   | Remission | No                   | No             | Yes         |
| 15*     | F      | 22          | 23               | None                   | Active    | No                   | Yes            | Yes         |
| 16*     | F      | 75          | 265              | Prednisone 2.5 mg q.d. | Remission | No                   | Yes            | Yes         |
| 17      | M      | 30          | 212              | None                   | Remission | No                   | Yes            | No          |
| 18*     | M      | 70          | 150              | None                   | Remission | No                   | Yes            | No          |
| 19      | F      | 30          | 237              | None                   | Remission | No                   | Yes            | No          |
| 20*     | M      | 70          | 159              | Prednisone 10 mg q.d.  | Remission | No                   | Yes            | No          |
| 21      | F      | 68          | 47               | None                   | Active    | No                   | Yes            | Yes         |
| 22      | F      | 68          | 30               | Prednisone 7.5 mg q.d. | Active    | No                   | No             | Yes         |
| 23*     | M      | 57          | 454              | None                   | Remission | No                   | No             | Yes         |

\* indicates that the patient has been splenectomized

## **Preparation of peripheral blood mononuclear cells (PBMCs) and T-lymphocytes.**

PBMCs were prepared from heparinised blood by density gradient centrifugation. After removal of CD14<sup>+</sup> cells, T-lymphocytes were positively selected using CD3<sup>+</sup> magnetic microbeads, according to the manufacturer's recommendations (MACS; Miltenyi Biotec, Surrey, UK). The purity of isolated cells was determined by flow cytometry; 93.6-96.2% of the cells were CD3<sup>+</sup> T-cells, with no significant differences between the study groups.

## **Preparation of RNA and hybridization to DNA microarrays**

RNA was isolated from the CD3<sup>+</sup> T-cell preparations using the Chomczynski method (Chomczynski, P. & Sacchi, N. *Anal. Biochem.* **162**, 156-159 (1987)), followed by RNeasy clean up (Qiagen, Hilden, Germany). The RNA from 5 patients in each group was pooled in equal amounts. Each pool was analysed in duplicates as described (Benson, M. et al. *Clin. Exp. Allergy* **32**, 301-308 (2002)). Briefly, RNA was transcribed into cDNA (Life Technologies, Rockville, MD) and biotin-labeled cRNA (Enzo, Farmingdale, NY) was resynthesized. Hybridization to DNA microarrays (Human Genome U95A array version 2; Affymetrix, Santa Clara, CA) and detection of hybridized target cRNA was performed according to the Affymetrix Gene Chip Expression Analysis manual. Quality of the cDNA-synthesis and in vitro transcription was assessed by hybridization to Test2-arrays (Affymetrix).

### **Data analysis**

Scanned output files were visually inspected for hybridization artifacts and then analyzed with MicroarraySuite 5.0 software (Affymetrix). The arrays were scaled to an average intensity of 500. Genes were clustered and selected using Genespring 5.0 (Silicon Genetics, Redwood City, CA).

### **Flow cytometry**

PBMCs were incubated with anti-CD3-Peridone-Chlorophyll-Cy5.5, anti-CD158a-phycoerythrin (PE) (specific for KIR3DL2), anti-CD158b-PE (specific for KIR2DL3) and NKB1-PE (specific for KIR3DL1). Appropriate isotype matched control antibodies were used. All monoclonal antibodies (MoAbs) were from Becton Dickinson Bioscience (San Diego, CA.). A FACScan (Becton Dickinson, Mountain View, CA) was used, and 30 000 events were collected. Data were analyzed using the WinMDI software (trotter@scripps.edu). The fraction of CD3<sup>+</sup> cells expressing CD158a, CD158b and NKB1 was determined by setting a quadrant gate in the fluorescence dotplot for CD3<sup>+</sup> cells. All samples were analyzed in triplicates.

### **Analysis of cell-mediated cytotoxicity**

PBMC were prepared as described above. CD14<sup>+</sup> and CD19<sup>+</sup> cells were removed from PBMCs by magnetic microbeads (MACS; Miltenyi Biotec). The mean percentages of T- (CD3<sup>+</sup>) and NK-cells (CD3<sup>-</sup>/CD16<sup>+</sup>/CD56<sup>+</sup>) in the cell preparations were 75±4% and 14±3%, respectively. The cell concentration was adjusted to 2 x 10<sup>6</sup> cells/mL and then diluted in RPMI-1640 (Life Technologies, USA) medium supplemented with 5% heat-inactivated human AB<sup>+</sup> serum to achieve a final effector/target (ET) ratio of 0.625:1. Autologous platelets were radiolabeled with <sup>111</sup>In (Amersham, Buckinghamshire, UK) as described (Wadenvik, H. & Kutti, J.

*Br. J. Haematol.* **78**, 523-528 (1991)) and used as target cells. All cells were washed free from plasma. To stimulate cytolytic effector T-cells, anti-CD3-antibody (R&D Systems, Abingdon, UK) was added in five 4-fold dilutions, starting with 4 µg/ml. Effector cells, target cells and anti-CD3 MoAb were added to a 96-well plate in triplicates and incubated for 4 hours. Thereafter, the plates were centrifuged and the supernatants were counted in a gamma counter. Spontaneous lysis was determined in control wells only holding culture media and radiolabeled platelets. Maximal lysis was determined after addition of Triton X-100 (Sigma Chemical Co, Saint Louis, MI) to a final concentration of 1%. The specific lysis was calculated as follows: (observed lysis-spontaneous lysis)/(maximal lysis-spontaneous lysis), and expressed in percent.

The specificity of the cytotoxic cell lysis was addressed in another set of experiments in which radiolabeled HLA disparate platelets, obtained from blood group 0 donors, were used as target cells. The effector cells were CD14-/CD19- PBMCs obtained from active ITP patients (n=5) known to have a positive lysis test against autologous platelets.

Additionally, to address the relative role of NK- and CD8+ T-cell mediated platelet lysis, purified fractions of NK-cells and CD8+ T-cells were isolated, from active ITP patients known to have a positive platelet lysis test, by magnetic microbeads (MACS NK cell isolation kit and CD8+ T cell isolation kit, respectively; Miltenyi Biotec) and used as effector cells (n=5). The purity of the isolated CD3+/CD8+ cells was 88±0.9%; less than 0.2% of the cells were NK-cells (CD3-/CD16+/CD56+). Similarly, the purity of the isolated NK-cells was 75±5.8%; less than 0.8% was CD3+ T-cells. The target cells in this experiment were autologous radiolabeled platelets.

## **Statistics**

Unless otherwise stated, the mean values ± SEM are reported. Differences between groups were evaluated using analysis of variance (ANOVA for repeated measurements). Differences in number of patients with a positive platelet lysis test between groups were evaluated using the Fisher's Exact Test (2x2). A *P*-value < 0.05 was considered statistically significant.
